# Supplementary material for: Dispersive liquid–liquid microextraction using functionalized Mg(OH)2 NPs with oleic acid as hydrophobic affinity probes for the analysis of hydrophobic proteins in bacteria by MALDI MS
Source: Royal Society of Chemistry journal article supplement (doi:10.1039/c2an35788g), 2012-01-01
Supplement: c2an35788g.pdf [file c2an35788g.pdf]

## Supporting Information of Dispersive liquid-liquid microextraction using functionalized Mg(OH)<sub>2</sub> NPs with oleic acid as hydrophobic affinity probes for the analysis of hydrophobic proteins in bacteria by MALDI-MS

Suresh Kumar Kailasa,<sup>a,b,c</sup> and Hui-Fen Wu,<sup>a,b,d\*</sup>

<sup>a</sup>Department of Chemistry, National Sun Yat-Sen University, Kaohsiung, 80424, Taiwan

<sup>b</sup>Center for Nanoscience and Nanotechnology, National Sun Yat-Sen University, Kaohsiung, 80424, Taiwan

<sup>c</sup>Department of Applied Chemistry, S. V. National Institute of Technology, Surat – 395007, India

<sup>d</sup>Doctoral Degree Program in Marine Biotechnology, National Sun Yat-Sen University, Kaohsiung 80424, Taiwan

**Supporting Information of Table S1.** Identified hydrophobic proteins in *B. subtilis* by OA capped Mg(OH)<sub>2</sub> NPs-assisted LLME coupled with MALDI MS.<sup>a</sup>

| S. No. | Protein name | Observed <i>m/z</i> | Theoretical <i>m/z</i> |
|--------|--------------|---------------------|------------------------|
| 1      | <i>ygdI</i>  | 7015                | 7009                   |
| 2      | <i>lpp</i>   | 7167                | 7173                   |
| 3      | <i>yuzA</i>  | 8505                | 8500                   |
| 4      | <i>ptsH</i>  | 9210                | 9200                   |
| 5      | <i>dbhA</i>  | 9528                | 9535                   |
| 6      | <i>glrXI</i> | 9678                | 9685                   |
| 7      | <i>yubF</i>  | 10020               | 10000                  |
| 8      | <i>lytA</i>  | 11210               | 11220                  |
| 9      | <i>yoxC</i>  | 11420               | 11400                  |
| 10     | <i>ytzB</i>  | 11710               | 11700                  |
| 11     | <i>cccB</i>  | 11920               | 11900                  |
| 12     | <i>rplS</i>  | 13720               | 13700                  |
| 13     | <i>yteJ</i>  | 19070               | 19100                  |

<sup>a</sup>Hydrophobic proteins are identified as per the described method in the literature.<sup>37,38</sup>
